# Supplementary material
Source: MDPI journal article supplement (https://www.mdpi.com/2073-445X/11/10/1821)
Supplement: s1 [file s1]

## **Supplementary materials**

# **Willingness and technology preference of farmers and their influencing factors for soil remediation**

*Yunxian Yan<sup>1, 2</sup>, Lingqing Wang<sup>1, 2</sup>, Jun Yang<sup>1, 2\*</sup>*

<sup>1</sup> Institute of Geographic Sciences and Natural Resources Research, Chinese Academy of Sciences, Beijing 100101, China

<sup>2</sup> College of Resources and Environment, University of Chinese Academy of Sciences, Beijing 100049, China

## S1 Survey area

Table S1 Survey areas.

| Coden<br>ame | Location                                                                                            | Climate zones                                       | Contamina<br>tions                | Causes                                         | Phytore<br>mediati<br>on (mu) | Passivati<br>on (mu) | Numbe<br>r of<br>samples | Note                                                       |
|--------------|-----------------------------------------------------------------------------------------------------|-----------------------------------------------------|-----------------------------------|------------------------------------------------|-------------------------------|----------------------|--------------------------|------------------------------------------------------------|
| A            | Longmen Village,<br>Xiying Township,<br>Luancheng District,<br>Shijiazhuang City,<br>Hebei Province | Temperate<br>continental<br>monsoon<br>climate zone | Arsenic,<br>cadmium               | Sewage<br>irrigation                           | 100                           | 300                  | 98                       | No significant impact on<br>human health and crop<br>yield |
| B            | Wuxing Village,<br>Banqiao Town,<br>Mianzhu City, Deyang,<br>Sichuan Province                       | Humid<br>subtropical<br>climate zone                | Chromium<br>, arsenic,<br>cadmium | Phosphogyps<br>um slag site                    | 500                           | 500                  | 147                      | No significant impact on<br>human health and crop<br>yield |
| C            | Heshan Village, Baiyun<br>Township, Shimen<br>County, Changde City,<br>Hunan Province               | Monsoon<br>climate zone                             | Arsenic                           | Realgar<br>mining and<br>arsenic<br>smelting   | 959                           | 1017                 | 190                      | Serious harm to local<br>human health                      |
| D            | Sidi Village, Xingping<br>Town, Yangshuo<br>County, Guilin City,<br>Guangxi Province                | Central<br>subtropical<br>monsoon<br>climate zone   | Cadmium,<br>lead,<br>arsenic      | Lead-zinc<br>tailings sand<br>dam<br>collapses | 75                            | 212                  | 118                      | Severe impact on crop<br>growth                            |

## **S2 Survey questionnaire**

Farmers in four soil remediation project areas in China where both phytoremediation and passivation remediation were conducted were targeted to conduct a household questionnaire survey using random sampling and a one-to-one structured interview method. Specifically, the researcher asked the farmers questions and filled out a questionnaire based on their responses.

The main content of the questionnaire consisted of five parts: basic information about the farmers interviewed (such as gender, age, education), household and production characteristics (including family size, farmland area, income composition), current status of participation in soil remediation (such as farmland area remediated, labor income), satisfaction with current remediation and willingness to remediate in the future, preference for remediation technology, and impact of technical characteristics. The content of the questionnaire relevant to this study is as follows.

### **A Basic information of the farmers interviewed**

A01 Name

A02 Gender\_\_\_\_\_ (1=man, 0=woman)

A03 Age\_\_\_\_\_ (one full year of life)

A04 Education\_\_\_\_\_ ( Number of years in school)

A05 Environmental protection awareness\_\_\_\_\_ (1 = very weak; 2 = relatively weak;  
3 = normal; 4 = relatively strong; 5 = very strong)

## B Household and production characteristics

B01 There are \_\_\_\_\_ people in the family and \_\_\_\_\_ people working in agriculture.

B02 How much mu of farmland do your family have? \_\_\_\_\_ mu.

B03 How much mu of farmland currently produce crops? \_\_\_\_\_ mu.

B04 Input and output of farmland.

| Variable name     | Unit     | Crop 1 _____ |  | Crop 2 _____ |  | Crop 3 _____ |  |
|-------------------|----------|--------------|--|--------------|--|--------------|--|
| Sown area         | Mu       |              |  |              |  |              |  |
| Single yield      | kg/mu    |              |  |              |  |              |  |
| Unit price        | yuan/kg  |              |  |              |  |              |  |
| Seeds             | yuan     |              |  |              |  |              |  |
| Fertilizers       | yuan     |              |  |              |  |              |  |
| Herbicides        | yuan     |              |  |              |  |              |  |
| Plowing           | yuan     |              |  |              |  |              |  |
| Sowing            | yuan     |              |  |              |  |              |  |
| Harvesting        | yuan     |              |  |              |  |              |  |
| Transporting      | yuan     |              |  |              |  |              |  |
| Total farm income | yuan /mu |              |  |              |  |              |  |

B05 Household income (except income from participation in soil remediation projects).

| Variable name                 | Self-employed industrial and commercial income | Income from working outside | Income from working locally | Soil rent subsidy | Breeding income | Transfer income (from children or relatives) | Government subsidy | Total income |
|-------------------------------|------------------------------------------------|-----------------------------|-----------------------------|-------------------|-----------------|----------------------------------------------|--------------------|--------------|
| Before project implementation |                                                |                             |                             |                   |                 |                                              |                    |              |

|                              |  |  |  |  |  |  |  |  |
|------------------------------|--|--|--|--|--|--|--|--|
| After project implementation |  |  |  |  |  |  |  |  |
|------------------------------|--|--|--|--|--|--|--|--|

### C Current status of participation in soil remediation

C01 Does your family have farmland to carry out soil remediation projects?

\_\_\_\_\_ (1=yes; 2=no)

C02 Participate in passivation

C02-1 A total of \_\_\_\_\_ mu for passivation with subsidies of \_\_\_\_\_ per mu.

C02-2 Income from employment related to participation in passivation \_\_\_\_\_.

| Variable name                | Unit        | Crop 1_____ | Crop 2_____ | Crop 3_____ |
|------------------------------|-------------|-------------|-------------|-------------|
| Labor unit price             | yuan/manday |             |             |             |
| Sown area                    | mu          |             |             |             |
| Plowing and seeding          | manday      |             |             |             |
| Fertilizer application       | manday      |             |             |             |
| Herbicide injection          | manday      |             |             |             |
| Other passivation employment | manday      |             |             |             |

C02-3 Crop income from farmland of passivation \_\_\_\_\_

| Variable name | Unit    | Crop 1_____ | Crop 2_____ | Crop 3_____ |
|---------------|---------|-------------|-------------|-------------|
| Cost          | yuan/mu |             |             |             |
| Area          | mu      |             |             |             |
| Unit yield    | kg/mu   |             |             |             |
| Unit price    | yuan/kg |             |             |             |

C03 Participate in phytoremediation

C03-1 A total of \_\_\_\_\_ mu for phytoremediation with subsidies of \_\_\_\_\_ per

mu.

C03-2 Income from employment related to participation in phytoremediation

\_\_\_\_\_.

| Variable name                     | Unit        | Hyperaccumulator |
|-----------------------------------|-------------|------------------|
| Labor unit price                  | yuan/manday |                  |
| Area                              | mu          |                  |
| Transplanting                     | manday      |                  |
| Activator application             | manday      |                  |
| Fertilizer application            | manday      |                  |
| Weed control                      | manday      |                  |
| Mowing                            | manday      |                  |
| Other phytoremediation employment | yuan        |                  |

#### **D Satisfaction with current remediation and willingness to remediate in the future**

The following scores are set as 1: strongly disagree; 2: relatively disagree; 3: not sure; 4: relatively agree; 5: strongly agree

D01 Soil remediation is carried out without affecting household food supply.\_\_\_\_\_

D02 Subsidies for farmland involved in soil remediation can compensate for losses. \_\_\_\_\_

D03 Participation in soil remediation has increased family income. \_\_\_\_\_

D04 You are satisfied with the current state of the remediation. \_\_\_\_\_

D05 You will continue to support contaminated soil remediation projects. \_\_\_\_\_

D06 You are willing to transfer all your farmland for soil remediation. \_\_\_\_\_

D07 Did you think about petitioning before the remediation project started because of pollution issues?\_\_\_\_\_ (yes/no) Do you still want to petition now?\_\_\_\_\_ ( yes/no)

### **E Remediation technology preferences and technical characteristics impact**

E01 Do you think the agricultural soils need remediation in the current situation?\_\_\_\_\_ (1=yes; 2=no)

E02 If yes, which remediation technology do you prefer?\_\_\_\_\_ (1=phytoremediation; 2=passivation)

E03 What factors do you value in a remediation technology and please rate the factors that influence your choice of technology characteristics (1: strongly disagree; 2: relatively disagree; 3: not sure; 4: relatively agree; 5: strongly agree)

- 1 Remediation period\_\_\_\_\_
- 2 Economic income\_\_\_\_\_
- 3 Soil quality\_\_\_\_\_
- 4 Risk of secondary contamination \_\_\_\_\_
- 5 Other factors\_\_\_\_\_

E04 Why do you think soil remediation is not needed?\_\_\_\_\_

### **S3 Descriptive statistics of sample farmers**

Table S2 Descriptive statistics of sample farmers.

| Indicator | Category | Frequency | Proportion (%) | Option            | Frequency | Proportion (%) |
|-----------|----------|-----------|----------------|-------------------|-----------|----------------|
| Gender    | man      | 342       | 61.9           | non-participation | 23        | 6.7            |

| Indicator   | Category           | Frequency | Proportion (%) | Option            | Frequency | Proportion (%) |
|-------------|--------------------|-----------|----------------|-------------------|-----------|----------------|
|             | woman              | 211       | 38.1           | phytoremediation  | 272       | 79.5           |
|             |                    |           |                | passivation       | 47        | 13.7           |
|             |                    |           |                | non-participation | 3         | 1.4            |
|             |                    |           |                | phytoremediation  | 186       | 88.2           |
|             |                    |           |                | passivation       | 22        | 10.4           |
|             |                    |           |                | non-participation | 0         | 0.0            |
| Age         | <40                | 17        | 3.1            | phytoremediation  | 14        | 82.4           |
|             |                    |           |                | passivation       | 3         | 17.6           |
|             |                    |           |                | non-participation | 6         | 7.6            |
|             | [40, 50)           | 79        | 14.3           | phytoremediation  | 67        | 84.8           |
|             |                    |           |                | passivation       | 6         | 7.6            |
|             |                    |           |                | non-participation | 12        | 6.6            |
|             | [50, 60)           | 181       | 32.7           | phytoremediation  | 147       | 81.2           |
|             |                    |           |                | passivation       | 22        | 12.2           |
|             |                    |           |                | non-participation | 7         | 3.5            |
|             | [60, 70)           | 199       | 36.0           | phytoremediation  | 169       | 84.9           |
|             |                    |           |                | passivation       | 23        | 11.6           |
|             |                    |           |                | non-participation | 1         | 1.3            |
|             | ≥70                | 77        | 13.9           | phytoremediation  | 61        | 79.2           |
|             |                    |           |                | passivation       | 15        | 19.5           |
|             |                    |           |                | non-participation | 2         | 1.6            |
| Education   | Illiterate         | 122       | 22.1           | phytoremediation  | 106       | 86.9           |
|             |                    |           |                | passivation       | 14        | 11.5           |
|             |                    |           |                | non-participation | 12        | 5.3            |
|             | Primary school     | 228       | 41.2           | phytoremediation  | 186       | 81.6           |
|             |                    |           |                | passivation       | 30        | 13.2           |
|             |                    |           |                | non-participation | 9         | 5.8            |
|             | Junior high school | 156       | 28.2           | phytoremediation  | 126       | 80.8           |
|             |                    |           |                | passivation       | 21        | 13.5           |
|             |                    |           |                | non-participation | 3         | 6.7            |
|             | High school        | 45        | 8.1            | phytoremediation  | 38        | 84.4           |
|             |                    |           |                | passivation       | 4         | 8.9            |
|             |                    |           |                | non-participation | 0         | 0.0            |
|             | College and above  | 2         | 0.4            | phytoremediation  | 2         | 100.0          |
|             |                    |           |                | passivation       | 0         | 0.0            |
|             |                    |           |                | non-participation | 2         | 5.7            |
| Family size | 1                  | 35        | 6.3            | phytoremediation  | 27        | 77.1           |
|             |                    |           |                | passivation       | 6         | 17.1           |
|             |                    |           |                | non-participation | 6         | 3.6            |
|             | 2                  | 166       | 30.0           | phytoremediation  | 135       | 81.3           |
|             |                    |           |                | passivation       | 25        | 15.1           |
|             |                    |           |                | non-participation | 16        | 7.8            |
|             | 3-4                | 204       | 36.9           | phytoremediation  | 170       | 83.3           |
|             |                    |           |                | passivation       | 18        | 8.8            |
|             |                    |           |                | non-participation | 1         | 0.8            |
|             | 5-6                | 126       | 22.8           | phytoremediation  | 108       | 85.7           |
|             |                    |           |                | passivation       | 17        | 13.5           |
|             |                    |           |                | non-participation | 1         | 4.5            |
|             | ≥ 7                | 22        | 4.0            | phytoremediation  | 18        | 81.8           |
|             |                    |           |                | passivation       | 0         | 0.0            |



| Indicator            | Category       | Frequency | Proportion (%) | Option            | Frequency | Proportion (%) |
|----------------------|----------------|-----------|----------------|-------------------|-----------|----------------|
| Agricultural labor   | 0              | 14        | 2.6            | passivation       | 3         | 13.6           |
|                      |                |           |                | non-participation | 1         | 7.1            |
|                      |                |           |                | phytoremediation  | 12        | 85.7           |
|                      | 1              | 87        | 15.7           | passivation       | 1         | 7.1            |
|                      |                |           |                | non-participation | 4         | 4.6            |
|                      |                |           |                | phytoremediation  | 76        | 87.4           |
|                      | 2              | 292       | 52.8           | passivation       | 7         | 8.0            |
|                      |                |           |                | non-participation | 20        | 6.8            |
|                      |                |           |                | phytoremediation  | 236       | 80.8           |
|                      | 3-4            | 117       | 21.1           | passivation       | 36        | 12.3           |
|                      |                |           |                | non-participation | 0         | 0.0            |
|                      |                |           |                | phytoremediation  | 98        | 83.8           |
|                      | $\geq 5$       | 43        | 7.8            | passivation       | 19        | 16.2           |
|                      |                |           |                | non-participation | 1         | 2.3            |
|                      |                |           |                | phytoremediation  | 36        | 83.7           |
| Annual income (yuan) | <5000          | 91        | 16.5           | passivation       | 6         | 14.0           |
|                      |                |           |                | non-participation | 9         | 9.9            |
|                      |                |           |                | phytoremediation  | 71        | 78.0           |
|                      | [5000, 15000)  | 189       | 34.2           | passivation       | 11        | 12.1           |
|                      |                |           |                | non-participation | 8         | 4.2            |
|                      |                |           |                | phytoremediation  | 157       | 83.1           |
|                      | [15000, 25000) | 103       | 18.6           | passivation       | 24        | 12.7           |
|                      |                |           |                | non-participation | 5         | 4.9            |
|                      |                |           |                | phytoremediation  | 85        | 82.5           |
|                      | [25000, 35000) | 77        | 13.9           | passivation       | 13        | 12.6           |
|                      |                |           |                | non-participation | 2         | 2.6            |
|                      |                |           |                | phytoremediation  | 64        | 83.1           |
|                      | $\geq 35000$   | 93        | 16.8           | passivation       | 11        | 14.3           |
|                      |                |           |                | non-participation | 2         | 2.2            |
|                      |                |           |                | phytoremediation  | 81        | 87.1           |
|                      |                |           |                | passivation       | 10        | 10.8           |
| Farmland area (mu)   | <2             | 91        | 16.4           | non-participation | 9         | 9.9            |
|                      |                |           |                | phytoremediation  | 71        | 78.0           |
|                      |                |           |                | passivation       | 11        | 12.1           |
|                      | [2, 4)         | 189       | 34.1           | non-participation | 8         | 4.2            |
|                      |                |           |                | phytoremediation  | 157       | 83.1           |
|                      |                |           |                | passivation       | 24        | 12.7           |
|                      | [4, 6)         | 103       | 18.7           | non-participation | 5         | 4.9            |
|                      |                |           |                | phytoremediation  | 85        | 82.5           |
|                      |                |           |                | passivation       | 13        | 12.6           |
|                      | [6, 8)         | 77        | 14             | non-participation | 2         | 2.6            |
|                      |                |           |                | phytoremediation  | 64        | 83.1           |
|                      |                |           |                | passivation       | 11        | 14.3           |
|                      | $\geq 8$       | 93        | 16.8           | non-participation | 2         | 2.2            |
|                      |                |           |                | phytoremediation  | 81        | 87.1           |
|                      |                |           |                | passivation       | 10        | 10.8           |
| Farm income (yuan/y) | $\leq 0$       | 320       | 57.9           | non-participation | 13        | 4.1            |
|                      |                |           |                | phytoremediation  | 274       | 85.6           |
|                      |                |           |                | passivation       | 33        | 10.3           |
|                      | (0, 1000]      | 58        | 10.5           | non-participation | 11        | 19.0           |
|                      |                |           |                | phytoremediation  | 44        | 75.9           |
|                      |                |           |                | passivation       | 3         | 5.2            |

| Indicator                | Category       | Frequency | Proportion (%) | Option            | Frequency | Proportion (%) |
|--------------------------|----------------|-----------|----------------|-------------------|-----------|----------------|
| Non-farm income (yuan/y) | (1000, 2500]   | 42        | 7.6            | non-participation | 1         | 2.4            |
|                          |                |           |                | phytoremediation  | 35        | 83.3           |
|                          |                |           |                | passivation       | 6         | 14.3           |
|                          | (2500, 4000]   | 30        | 5.4            | non-participation | 0         | 0.0            |
|                          |                |           |                | phytoremediation  | 25        | 83.3           |
|                          |                |           |                | passivation       | 5         | 16.7           |
|                          | >4000          | 103       | 18.7           | non-participation | 1         | 1.0            |
|                          |                |           |                | phytoremediation  | 80        | 77.7           |
|                          |                |           |                | passivation       | 22        | 21.4           |
|                          | 0              | 59        | 10.7           | non-participation | 3         | 5.1            |
|                          |                |           |                | phytoremediation  | 49        | 83.1           |
|                          |                |           |                | passivation       | 7         | 11.9           |
|                          | (0, 5000]      | 153       | 27.7           | non-participation | 7         | 4.6            |
|                          |                |           |                | phytoremediation  | 132       | 86.3           |
|                          |                |           |                | passivation       | 14        | 9.2            |
| Project income (yuan/y)  | (5000, 15000]  | 135       | 24.4           | non-participation | 9         | 6.7            |
|                          |                |           |                | phytoremediation  | 107       | 79.3           |
|                          |                |           |                | passivation       | 19        | 14.1           |
|                          | (15000, 25000] | 91        | 16.5           | non-participation | 4         | 4.4            |
|                          |                |           |                | phytoremediation  | 74        | 81.3           |
|                          |                |           |                | passivation       | 13        | 14.3           |
|                          | >25000         | 115       | 20.8           | non-participation | 3         | 2.6            |
|                          |                |           |                | phytoremediation  | 96        | 83.5           |
|                          |                |           |                | passivation       | 16        | 13.9           |
|                          | 0              | 134       | 24.2           | non-participation | 10        | 7.5            |
|                          |                |           |                | phytoremediation  | 101       | 75.4           |
|                          |                |           |                | passivation       | 23        | 17.2           |
|                          | (0, 1000)      | 119       | 21.6           | non-participation | 12        | 10.1           |
|                          |                |           |                | phytoremediation  | 94        | 79.0           |
|                          |                |           |                | passivation       | 13        | 10.9           |
|                          | [1000, 4000)   | 145       | 26.2           | non-participation | 3         | 2.1            |
|                          |                |           |                | phytoremediation  | 119       | 82.1           |
|                          |                |           |                | passivation       | 23        | 15.9           |
|                          | [4000, 7000)   | 74        | 13.4           | non-participation | 1         | 1.4            |
|                          |                |           |                | phytoremediation  | 64        | 86.5           |
|                          |                |           |                | passivation       | 9         | 12.2           |
|                          | $\geq 7000$    | 81        | 14.7           | non-participation | 0         | 0.0            |
|                          |                |           |                | phytoremediation  | 80        | 98.8           |
|                          |                |           |                | passivation       | 1         | 1.2            |

## S4 SEM

Table S3 Variable description and data statistics of the SEM.

| Latent variable            | Observable variable | Assign a value       | Mean | Standard deviation |
|----------------------------|---------------------|----------------------|------|--------------------|
| Individual characteristics | IC1 Age             | Assignment of 1-5    | 3.43 | 1.00               |
|                            | IC2 Education       | based on survey data | 2.24 | 0.90               |

|                           |                                                                 |                                                                                                   |      |      |
|---------------------------|-----------------------------------------------------------------|---------------------------------------------------------------------------------------------------|------|------|
|                           |                                                                 | according to a 5-point scale                                                                      |      |      |
|                           | IC3 Environmental protection awareness                          | 1: very weak; 2: relatively weak; 3: normal; 4: relatively strong; 5: very strong                 | 4.26 | 1.20 |
| Household endowments      | HE1 Agricultural labor                                          | Assignment of 1-5 based on survey data                                                            | 2.35 | 0.69 |
|                           | HE2 Farmland                                                    |                                                                                                   | 2.64 | 1.15 |
|                           | HE3 Income                                                      | according to a 5-point scale                                                                      | 2.80 | 1.33 |
|                           | HE4 Non-farm income                                             |                                                                                                   | 3.09 | 1.30 |
| Technical characteristics | TC1 I value the remediation period                              | 1: strongly disagree; 2: relatively disagree; 3: not sure; 4: relatively agree; 5: strongly agree | 4.18 | 0.97 |
|                           | TC2 I value the impact of remediation on soil quality           |                                                                                                   | 3.37 | 1.24 |
|                           | TC3 I value the secondary pollution from remediation technology |                                                                                                   | 2.93 | 1.42 |
| Participation status      | PS1 Farmland areas for remediation                              | Assignment of 1-5 based on survey data                                                            | 2.75 | 1.55 |
|                           | PS2 Project labor income                                        | according to a 5-point scale                                                                      | 2.21 | 1.37 |
| Perceived benefits        | PB1 Remediation does not affect food supply                     | 1: strongly disagree; 2: relatively disagree; 3: not sure; 4: relatively agree; 5: strongly agree | 4.49 | 0.87 |
|                           | PB2 Subsidies for participation in remediation can cover losses |                                                                                                   | 3.55 | 1.40 |
|                           | PB3 Participating in remediation can improve income             |                                                                                                   | 3.86 | 1.34 |
| Farmers' willingness      | FW1 Satisfied with the current status of remediation            | 1: strongly disagree; 2: relatively disagree; 3: not sure; 4: relatively agree; 5: strongly agree | 4.34 | 1.16 |
|                           | FW2 Willing to continue to support remediation                  |                                                                                                   | 4.71 | 0.80 |
|                           | FW3 Willing to remediate all farmland                           |                                                                                                   | 4.52 | 0.94 |

Table S4 Latent variable reliability test.

| Latent variable            | Cronbach $\alpha$ |
|----------------------------|-------------------|
| Individual characteristics | 0.872             |
| Household endowments       | 0.887             |
| Technical characteristics  | 0.885             |
| Participation status       | 0.863             |
| Perceived benefits         | 0.811             |
| Farmers' willingness       | 0.788             |

Table S5 KMO and Bartlett's test.

| KMO   | Bartlett's sphericity test |                   |              |
|-------|----------------------------|-------------------|--------------|
|       | Approximate chi-square     | Degree of freedom | Significance |
| 0.924 | 6291.605                   | 153               | 0.000        |

Table S6 Model structure validity (model fitness).

| Indicator name | Value   | Critical value         |
|----------------|---------|------------------------|
| Chi-square     | 373.539 | The smaller the better |
| Chi/DF         | 3.037   | 1-3                    |
| GFI            | 0.918   | > 0.9                  |
| AGFI           | 0.886   | > 0.9                  |
| RMSEA          | 0.065   | < 0.08                 |

## S5 Random forest

Table S7 Random forest variable descriptions and data statistics.

| Dependent variable                |                                                       | Variable type                                | Option 1         | Number  | Option 2    | Number  |
|-----------------------------------|-------------------------------------------------------|----------------------------------------------|------------------|---------|-------------|---------|
| Technology preference             |                                                       | Classification                               | Phytoremediation | 458     | Passivation | 69      |
| Independent variable              |                                                       | Variable type                                | Mean             | SD      | Mean        | SD      |
| Individual Farmer Characteristics | Gender                                                | Classification (man=1; woman=2)              | 1.41             | 0.49    | 1.32        | 0.47    |
|                                   | Age                                                   | Continuous                                   | 58.6             | 9.6     | 60.4        | 10.7    |
|                                   | Education                                             | Classification level (1-5)                   | 2.22             | 0.91    | 2.22        | 0.84    |
| Household endowments              | Family size                                           | Continuous                                   | 3.50             | 1.65    | 3.42        | 1.92    |
|                                   | Agricultural labor                                    | Continuous                                   | 2.38             | 1.30    | 2.59        | 1.41    |
|                                   | Farmland (mu)                                         | Continuous                                   | 4.12             | 2.36    | 3.90        | 2.30    |
|                                   | Income (yuan)                                         | Continuous                                   | 21928.2          | 24539.0 | 20097.4     | 17954.2 |
|                                   | Farm income (yuan)                                    | Continuous                                   | 1715.3           | 3822.5  | 3264.7      | 4954.8  |
|                                   | Non-farm income (yuan)                                | Continuous                                   | 15807.8          | 22915.3 | 16315.2     | 18635.7 |
| Participation status              | Participation in technology                           | Classification (non=0; pas=1; phy=2; both=3) | 1.06             | 0.89    | 0.87        | 0.86    |
|                                   | Project income (yuan)                                 | Continuous                                   | 2360.8           | 4345.0  | 634.5       | 1468.5  |
|                                   | Income difference before and after remediation (yuan) | Continuous                                   | 2158.3           | 6980.6  | 367.4       | 4321.0  |
| Technical characteristics         | Soil quality                                          | Classification level (1-5)                   | 3.57             | 1.21    | 2.49        | 1.04    |
|                                   | Secondary pollution                                   | Classification level (1-5)                   | 3.17             | 1.38    | 1.55        | 0.83    |
|                                   | Remediation period                                    | Classification level (1-5)                   | 4.11             | 0.96    | 4.62        | 0.97    |

## S6 Principal component analysis

Table S8 KMO and Bartlett's test (phytoremediation).

| KMO   | Bartlett's sphericity test |                   |              |
|-------|----------------------------|-------------------|--------------|
|       | Approximate chi-square     | Degree of freedom | Significance |
| 0.537 | 1068.550                   | 55                | 0.000        |

Table S9 Total variance explanation of PCA (phytoremediation).

| Component | Initial eigenvalues |               |              | Extraction sums of squared loadings |               |              |
|-----------|---------------------|---------------|--------------|-------------------------------------|---------------|--------------|
|           | Total               | % of variance | Cumulative % | Total                               | % of variance | Cumulative % |
| 1         | 2.420               | 21.999        | 21.999       | 2.420                               | 21.999        | 21.999       |
| 2         | 1.606               | 14.604        | 36.603       | 1.606                               | 14.604        | 36.603       |
| 3         | 1.486               | 13.509        | 50.112       | 1.486                               | 13.509        | 50.112       |
| 4         | 1.098               | 9.983         | 60.095       | 1.098                               | 9.983         | 60.095       |
| 5         | .961                | 8.738         | 68.834       |                                     |               |              |
| 6         | .895                | 8.138         | 76.971       |                                     |               |              |
| 7         | .846                | 7.688         | 84.659       |                                     |               |              |
| 8         | .606                | 5.510         | 90.169       |                                     |               |              |
| 9         | .478                | 4.349         | 94.518       |                                     |               |              |
| 10        | .445                | 4.041         | 98.559       |                                     |               |              |
| 11        | .158                | 1.441         | 100.000      |                                     |               |              |

Extraction method: principal component analysis.

Table S10 KMO and Bartlett's test (passivation).

| KMO   | Bartlett's sphericity test |                   |              |
|-------|----------------------------|-------------------|--------------|
|       | Approximate chi-square     | Degree of freedom | Significance |
| 0.550 | 149.670                    | 55                | 0.000        |

Table S11 Total variance explanation of PCA (passivation).

| Component | Initial eigenvalues |               |              | Extraction sums of squared loadings |               |              |
|-----------|---------------------|---------------|--------------|-------------------------------------|---------------|--------------|
|           | Total               | % of variance | Cumulative % | Total                               | % of variance | Cumulative % |
| 1         | 2.608               | 23.711        | 23.711       | 2.608                               | 23.711        | 23.711       |
| 2         | 1.561               | 14.188        | 37.899       | 1.561                               | 14.188        | 37.899       |
| 3         | 1.337               | 12.151        | 50.051       | 1.337                               | 12.151        | 50.051       |
| 4         | 1.264               | 11.489        | 61.540       | 1.264                               | 11.489        | 61.540       |
| 5         | 1.080               | 9.817         | 71.357       | 1.080                               | 9.817         | 71.357       |
| 6         | .899                | 8.171         | 79.528       |                                     |               |              |
| 7         | .690                | 6.273         | 85.801       |                                     |               |              |

|    |      |       |         |
|----|------|-------|---------|
| 8  | .548 | 4.984 | 90.784  |
| 9  | .399 | 3.631 | 94.415  |
| 10 | .328 | 2.981 | 97.396  |
| 11 | .286 | 2.604 | 100.000 |

---

Extraction method: principal component analysis.
